# Supplementary material
Source: PubMed Central journal article supplement (PMC2819033)
Supplement: NIHMS169197-supplement-Supplementary_Data.pdf [file NIHMS169197-supplement-Supplementary_Data.pdf]

**Supporting Information**

# Transferring the Concept of Multinuclearity to Ruthenium Complexes for Improvement of Anticancer Activity

*Maria G. Mendoza-Ferri,<sup>a</sup> Christian G. Hartinger,<sup>a,b,\*</sup> Marco A. Mendoza,<sup>c,∞</sup> Michael Groessel,<sup>a</sup>  
Alexander Egger,<sup>a</sup> Rene E. Eichinger,<sup>a</sup> John B. Mangrum,<sup>d</sup> Nicholas P. Farrell,<sup>d</sup> Magdalena  
Maruszak,<sup>e</sup> Patrick J. Bednarski,<sup>e</sup> Franz Klein,<sup>c</sup> Michael A. Jakupec,<sup>a</sup> Alexey A. Nazarov,<sup>a,\*</sup> Kay  
Severin,<sup>b</sup> Bernhard K. Keppler<sup>a</sup>*

<sup>a</sup> University of Vienna, Institute of Inorganic Chemistry, Austria

<sup>b</sup> Institut des Sciences et Ingénierie Chimiques, Ecole Polytechnique Fédérale de Lausanne,  
Switzerland

<sup>c</sup> Department of Chromosome Biology, Max F. Perutz Laboratories, University of Vienna, Austria

<sup>d</sup> Department of Chemistry, Virginia Commonwealth University, United States

<sup>e</sup> Department of Pharmaceutical and Medicinal Chemistry, University of Greifswald, Germany

**Table of contents:**

- 1.1 Elemental Analysis Data
- 1.2 Hydrolysis of **4c** by  $^1\text{H-NMR}$
- 1.3  $\text{p}K_{\text{a}}$  determination
- 1.4 Structures of **7** and **8**

### 1.1. Elemental Analysis Data

**Table S1.** Elemental Analyses Data for compounds **1a**, **3a** and **5a**

|          | <b>1a</b>                          |              | <b>3a</b>                          |              | <b>5a</b>                        |              |
|----------|------------------------------------|--------------|------------------------------------|--------------|----------------------------------|--------------|
|          | $C_{28}H_{28}N_2O_4 \cdot 2/3H_2O$ |              | $C_{30}H_{32}N_2O_4 \cdot 1/3H_2O$ |              | $C_{34}H_{40}N_2O_4 \cdot 2H_2O$ |              |
|          | <b>theoret.</b>                    | <b>found</b> | <b>theoret.</b>                    | <b>found</b> | <b>theoret.</b>                  | <b>found</b> |
| <b>C</b> | 71.78                              | 71.73        | 73.45                              | 73.39        | 70.81                            | 70.92        |
| <b>H</b> | 6.31                               | 6.35         | 6.71                               | 7.03         | 7.69                             | 7.78         |
| <b>N</b> | 5.98                               | 5.87         | 5.71                               | 5.67         | 4.86                             | 4.79         |

**Table S2.** Elemental Analyses Data for compounds **1b**, **3b** and **5b**

|          | <b>1b</b>                  |              | <b>3b</b>            |              | <b>5b</b>            |              |
|----------|----------------------------|--------------|----------------------|--------------|----------------------|--------------|
|          | $C_{14}H_{16}N_2O_4 \cdot$ |              | $C_{16}H_{20}N_2O_4$ |              | $C_{20}H_{28}N_2O_4$ |              |
|          | <b>theoret.</b>            | <b>found</b> | <b>theoret.</b>      | <b>found</b> | <b>theoret.</b>      | <b>found</b> |
| <b>C</b> | 60.86                      | 61.11        | 63.14                | 62.87        | 66.64                | 66.52        |
| <b>H</b> | 5.84                       | 6.09         | 6.62                 | 6.70         | 7.83                 | 7.63         |
| <b>N</b> | 10.14                      | 10.43        | 9.20                 | 9.06         | 7.77                 | 7.40         |

**Table S3.** Elemental Analyses Data for compounds **1c**, **3c** and **5c**

|          | <b>1c</b>                    |              | <b>3c</b>                    |              | <b>5c</b>                    |              |
|----------|------------------------------|--------------|------------------------------|--------------|------------------------------|--------------|
|          | $C_{34}H_{42}N_2O_4Ru_2Cl_2$ |              | $C_{36}H_{46}N_2O_4Ru_2Cl_2$ |              | $C_{40}H_{54}N_2O_4Ru_2Cl_2$ |              |
|          | <b>theoret.</b>              | <b>found</b> | <b>theoret.</b>              | <b>found</b> | <b>theoret.</b>              | <b>found</b> |
| <b>C</b> | 50.06                        | 49.87        | 51.24                        | 50.96        | 53.39                        | 53.09        |
| <b>H</b> | 5.19                         | 5.21         | 5.49                         | 5.59         | 6.05                         | 6.23         |
| <b>N</b> | 3.43                         | 3.14         | 3.32                         | 3.24         | 3.11                         | 3.12         |

## 1.2. Hydrolysis of **4c**

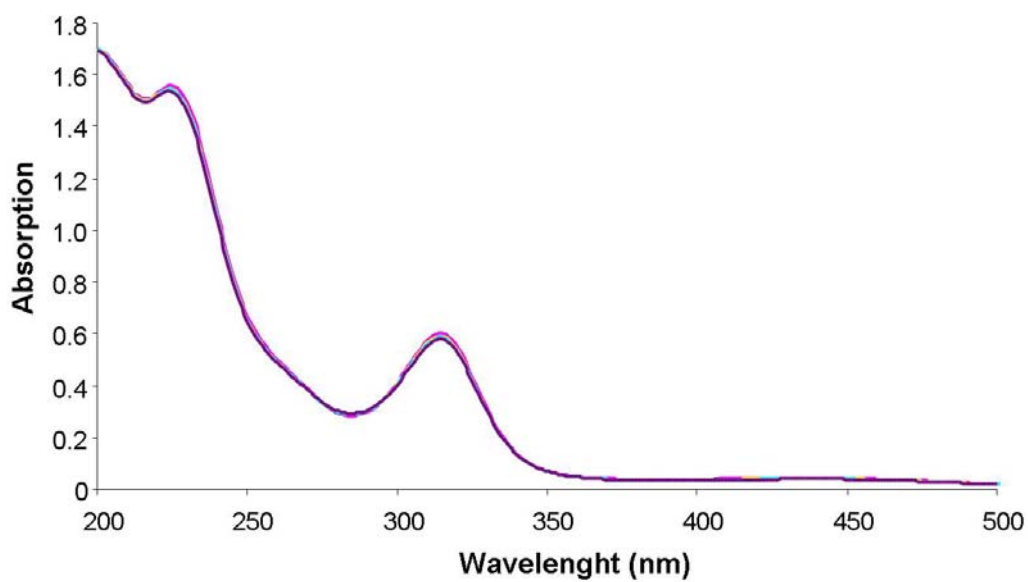

**Figure S1.** UV-vis spectra of **4c** in water measured over 2 d.

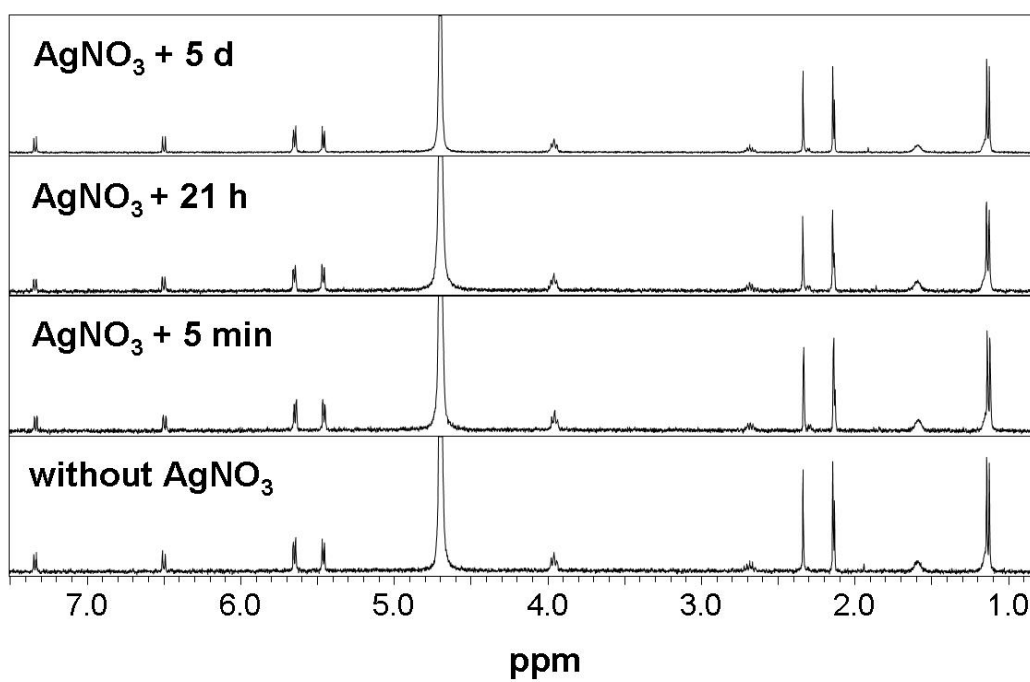

**Figure S2.** Time-resolved <sup>1</sup>H-NMR spectra of **4c** in D<sub>2</sub>O before and after addition of AgNO<sub>3</sub>.

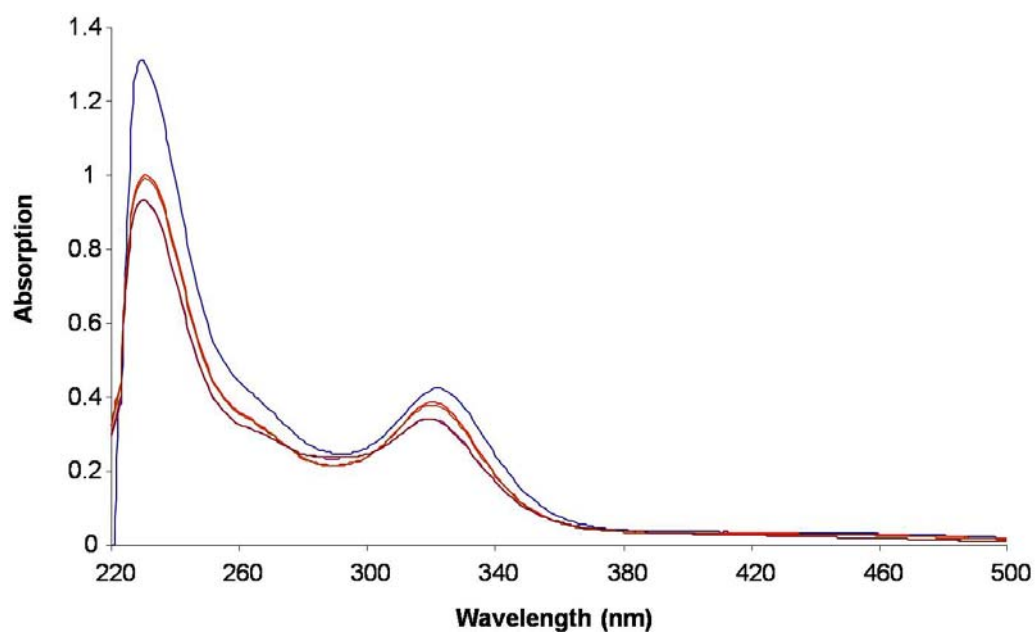

**Figure S3.** Time course of UV-vis spectra of **4c** prepared in dry methanol and after addition of 10% water to the sample.

### 1.3. $pK_a$ determination

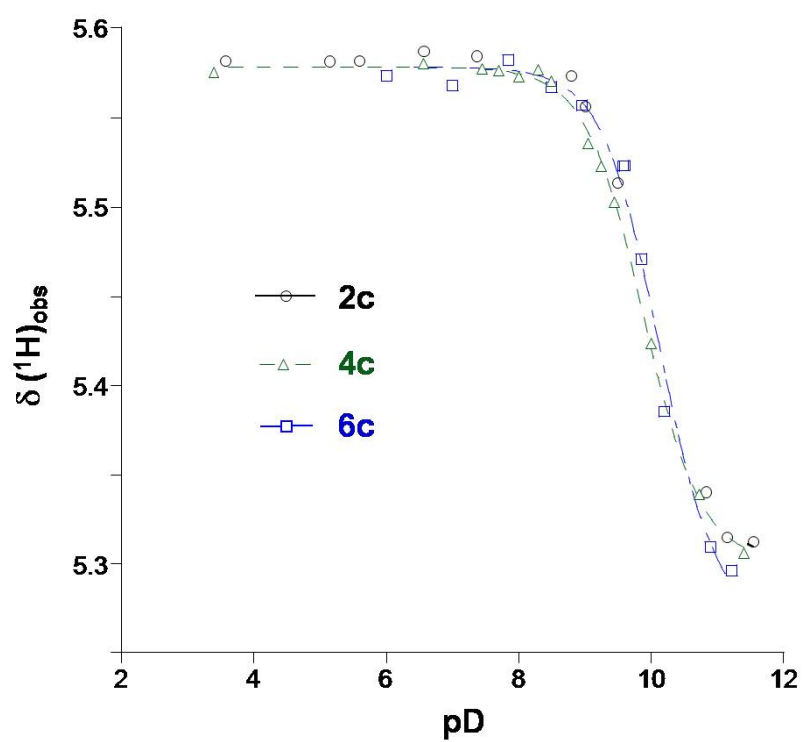

**Figure S4.** Observed  $^1\text{H}$ -NMR chemical shift ( $\delta_{\text{obs}}$ ) vs. pD values for **2c**, **4c**, and **6c**.

1.4. Structures of 7 and 8

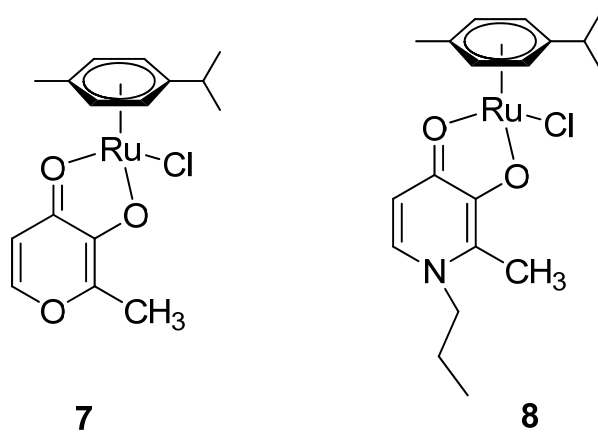

**Figure S5.** Structures of 7 and 8
